# Supplementary material for: Cobaltocenium-containing polybenzimidazole polymers for alkaline anion exchange membrane applications
Source: Royal Society of Chemistry journal article supplement (doi:10.1039/c6py01936f), 2016-12-27
Supplement: c6py01936f1.pdf [file c6py01936f1.pdf]

Supporting Information for:

## Cobaltocenium-containing polybenzimidazole polymers for alkaline anion exchange membrane applications

Nanjun Chen, Hong Zhu\*, Yuhao Chu, Rui Li, Yang Liu, Fanghui Wang  
State Key Laboratory of Chemical Resource Engineering, Institute of Modern Catalysis,  
Department of Organic Chemistry, School of Science, Beijing University of Chemical  
Technology, Beijing, 100029, P. R. China [Tel:+86-10-64444919](tel:+86-10-64444919);  
E-mail: [zhuho128@126.com](mailto:zhuho128@126.com)

### Table of content

**Fig. S1:** H-D exchange experiment of  $\text{DMCp}_2\text{Co}^+\text{PF}_6^-$  cations in  $\text{H}_2\text{O}/\text{D}_2\text{O}$  and  $\text{D}_2\text{O}/\text{KOH}$ .

**Fig. S2:** H-D exchange experiment of  $\text{DCCp}_2\text{Co}^+\text{PF}_6^-$  cations in  $\text{H}_2\text{O}/\text{KOH}$  and  $\text{D}_2\text{O}/\text{KOH}$ .

**Fig. S3:**  $^{13}\text{C}$ NMR spectra for (a)  $\text{Cp}_2\text{Co}^+$  (b)  $\text{DMCp}_2\text{Co}^+\text{PF}_6^-$  (c)  $\text{DCCp}_2\text{Co}^+\text{PF}_6^-$  in 1M  $\text{KOH}/\text{D}_2\text{O}$  at  $80^\circ\text{C}$  at various times.

**Fig. S4:** Mass spectra for (a)  $\text{Cp}_2\text{Co}^+$ , (b)  $\text{DMCp}_2\text{Co}^+\text{PF}_6^-$ , and (c)  $\text{DCCp}_2\text{Co}^+\text{PF}_6^-$

**Fig.S5:** Arrhenius plots of hydroxide conductivity of cobaltocenium-containing polybenzimidazole membranes.

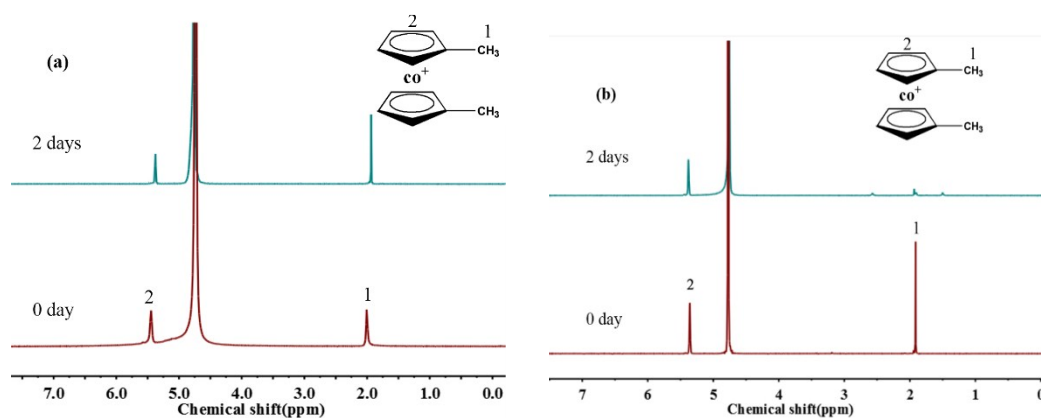

**Fig. S1:**  $^1\text{H}$ NMR spectra evidence for H-D exchange of  $\text{DMCp}_2\text{Co}^+\text{PF}_6^-$  in 1mol/L (a)  $\text{H}_2\text{O}/\text{KOH}$  and (b)  $\text{D}_2\text{O}/\text{KOH}$  at  $80^\circ\text{C}$  after 2 days: It can be seen that the  $^1\text{H}$  signal belongs to  $-\text{CH}_3$  (2.02 ppm) in  $\text{D}_2\text{O}/\text{KOH}$  decreases. But the  $^1\text{H}$  signals for  $\text{H}_2\text{O}/\text{KOH}$  show no change, indicating that the H-D exchange occurs mainly on  $-\text{CH}_3$ .

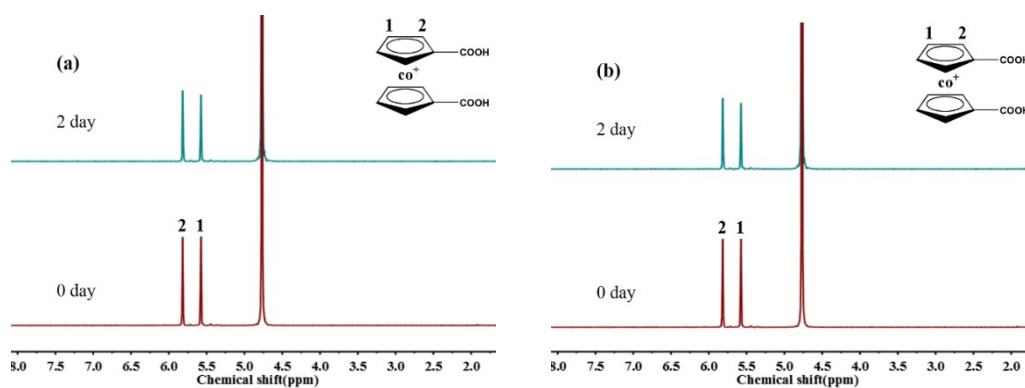

**Fig. S2:**  $^1\text{H}$ NMR spectra evidence for H-D exchange of  $\text{DCCp}_2\text{Co}^+\text{PF}_6^-$  in 1mol/L (a)  $\text{H}_2\text{O}/\text{KOH}$  and (b)  $\text{D}_2\text{O}/\text{KOH}$  at  $80^\circ\text{C}$  after 2 days: There is no difference between the  $^1\text{H}$ NMR spectra in (a) and (b), indicating that there is no H-D exchange in  $\text{DCCp}_2\text{Co}^+\text{PF}_6^-$

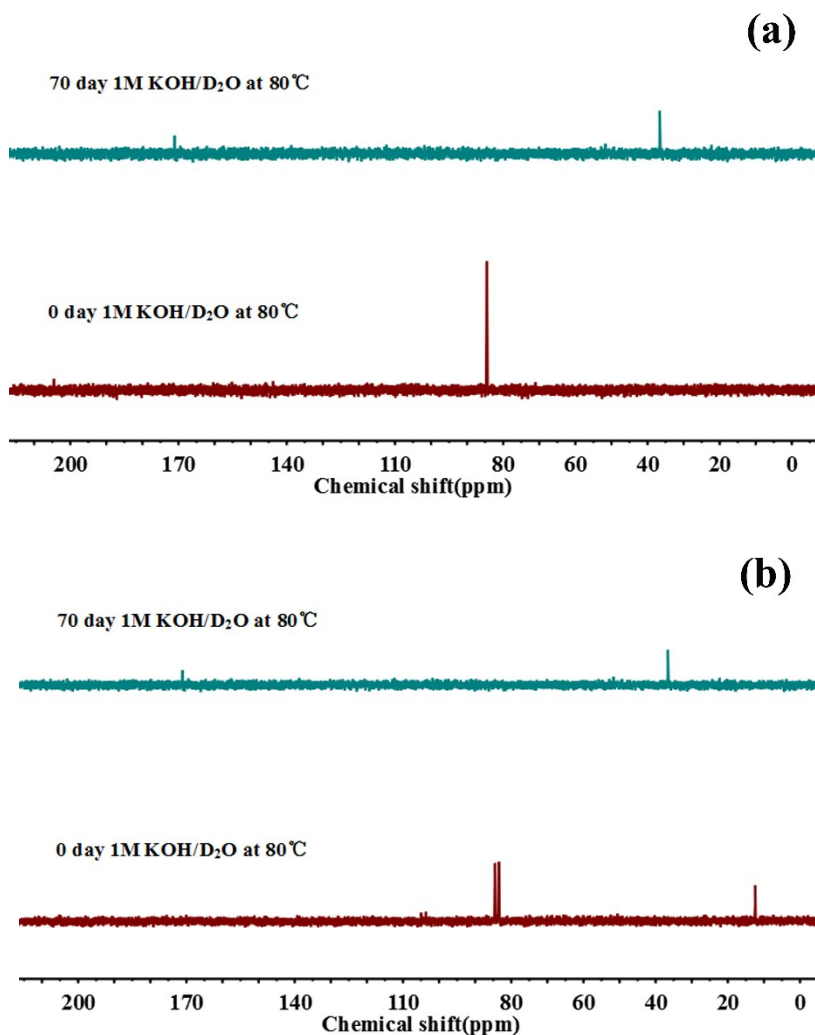

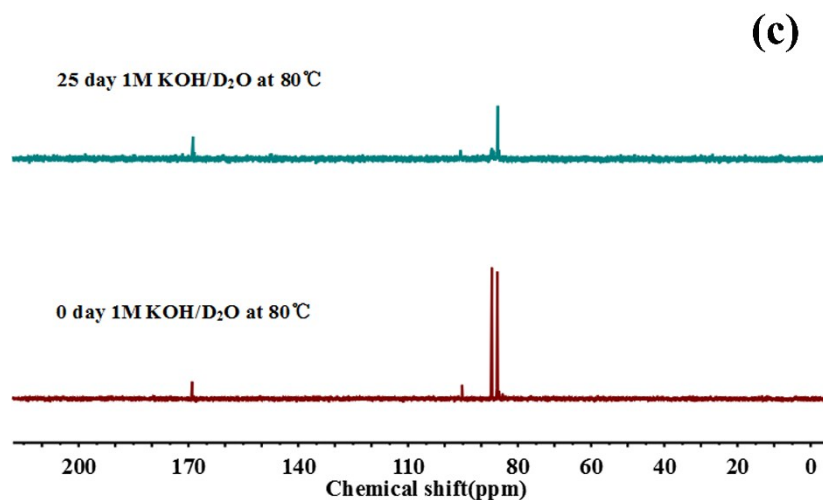

**Fig. S3:** <sup>13</sup>CNMR spectra of (a) Cp<sub>2</sub>Co<sup>+</sup>, (b) DMCp<sub>2</sub>Co<sup>+</sup>PF<sub>6</sub><sup>-</sup>, and (c) DCCp<sub>2</sub>Co<sup>+</sup>PF<sub>6</sub><sup>-</sup> in 1 M KOH/D<sub>2</sub>O at 80°C at various times.

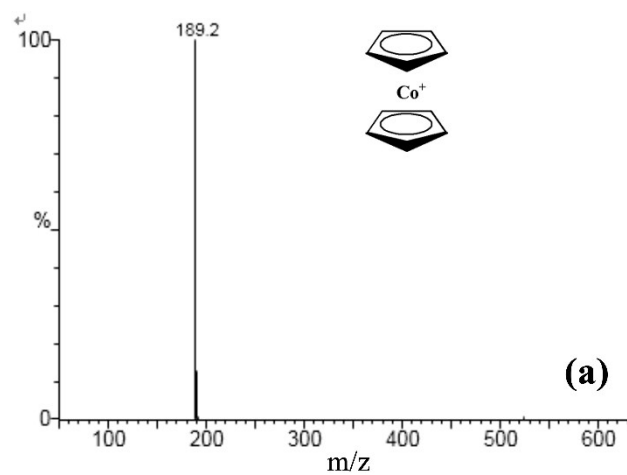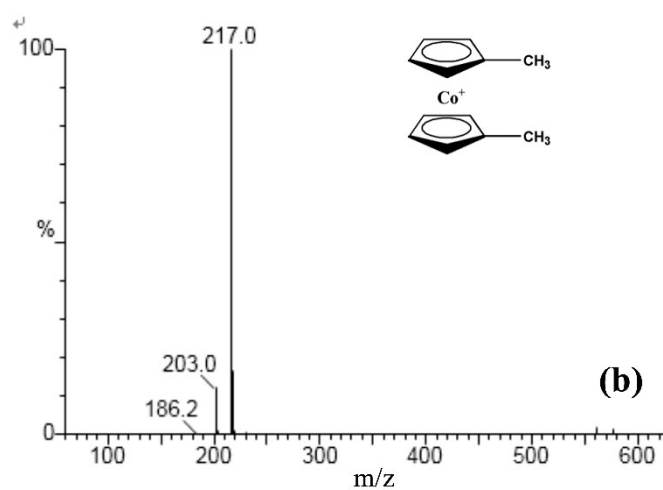

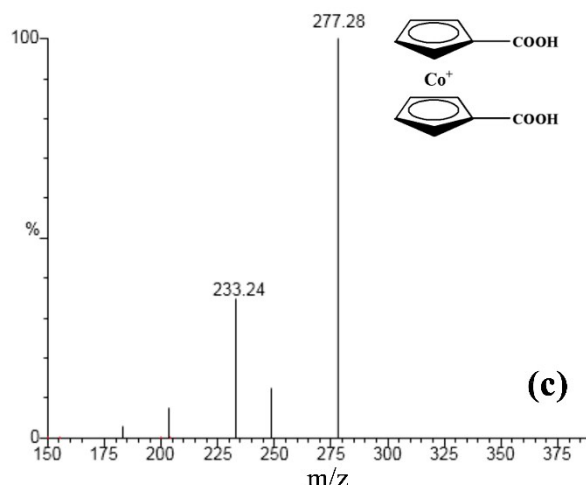

**Fig. S4:** Mass spectra of (a) Cp<sub>2</sub>Co<sup>+</sup>, (b) DMCP<sub>2</sub>Co<sup>+</sup>PF<sub>6</sub><sup>-</sup>, and (c) DCCp<sub>2</sub>Co<sup>+</sup>PF<sub>6</sub><sup>-</sup>

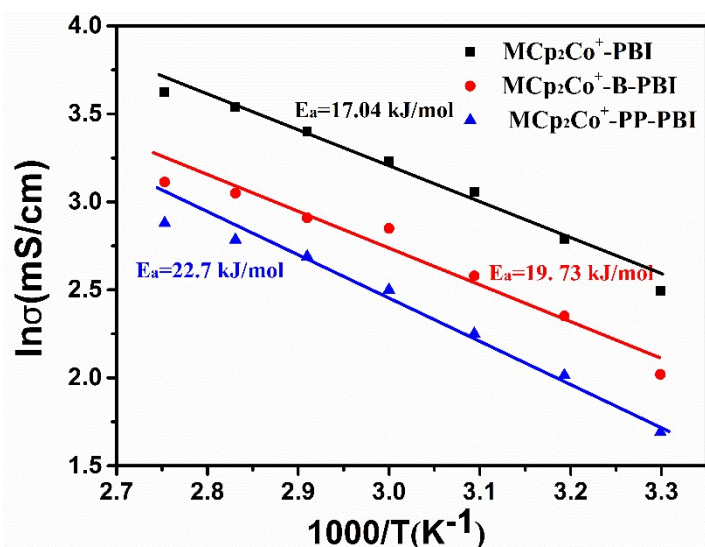

**Fig. S5:** Arrhenius plots of hydroxide conductivity of cobaltocenium-containing polybenzimidazole membranes.

### The calculation of the degree of degradation of cobaltocenium cations in alkaline medium

The <sup>1</sup>H NMR spectra were used to estimate the degree of degradation of the three cobaltocenium cations in alkaline medium. For example, as shown in Fig. 3(a). The degree of degradation can be calculated by the relative integrated intensities of the indicated <sup>1</sup>H resonances.  $(S_a + S_b + S_c + S_d + S_e) / S_1$  can be used to estimate the degree of degradation of Cp<sub>2</sub>Co<sup>+</sup> in Fig. 3(a), where  $S_a$ ,  $S_b$ ,  $S_c$ ,  $S_d$ ,  $S_e$  and  $S_1$  are the relative integrated intensities of the peaks marked with a, b, c, d, e, and 1, respectively.
